# Supplementary material for: Daptomycin-Nonsusceptible Staphylococcus aureus: The Role of Combination Therapy with Daptomycin and Gentamicin
Source: MDPI journal article supplement (doi:10.3390/genes6041256), 2015-11-30
Supplement: s1 [file s1]

## Supplementary Materials

**Table S1.** Studies related to daptomycin and gentamicin combination therapy.

| Author (Year)                       | Isolates Tested                                                       | Methods                                                                             | Dose                                                                                                                   | Findings                                                                                                                                                                 |
|-------------------------------------|-----------------------------------------------------------------------|-------------------------------------------------------------------------------------|------------------------------------------------------------------------------------------------------------------------|--------------------------------------------------------------------------------------------------------------------------------------------------------------------------|
| <i>in vitro</i> combination studies |                                                                       |                                                                                     |                                                                                                                        |                                                                                                                                                                          |
| Snydman <i>et al.</i> , (2005) [1]  | 20 MSSA (DAP-S)<br>20 MRSA (DAP-S)                                    | Checkerboard (fractional inhibitory concentration index)                            | DAP 0.01–8 µg/mL (0.0625–4× MIC)<br>Gen 0.01–4096 µg/mL (0.0625–4× MIC)                                                | DAP + Gen synergy observed for 1 MRSA strain. No synergistic inhibition of bacterial growth was observed among other isolates.                                           |
| Tsuji <i>et al.</i> , (2006) [2]    | 1 GISA (DAP-S)<br>1 hGISA (DAP-S)                                     | Time-kill<br>E-test                                                                 | DAP 0.25 µg/mL (0.5× MIC)<br>Gen 1 µg/mL (0.5× MIC)                                                                    | DAP + Gen and DAP alone were indifferent in Time-kill assays but showed additive effects using E-test                                                                    |
| Credito <i>et al.</i> , (2007) [3]  | 8 MSSA (DAP-S)<br>24 MRSA (DAP-S)<br>3 VISA (DAP-R)<br>3 VRSA (DAP-S) | Time-kill                                                                           | DAP 0.125–0.5 µg/mL for isolates with DAP-S (0.25–0.5× MIC)<br>DAP 0.5–4 µg/mL for isolates with DAP-R (0.25–0.5× MIC) | DAP + Gen showed synergy in killing 4 MSSA, 17 MRSA, 2VISA and 2 VRSA. Additive effects were observed among other isolates.                                              |
| Baltch <i>et al.</i> , (2007) [4]   | 1 MRSA (DAP-S)                                                        | Extracellular and Intracellular killing of staphylococci in human monocytes culture | DAP 0.5 µg/mL (1× MIC)<br>Gen 1µg/mL (0.5× MIC)                                                                        | DAP + Gen showed synergy for killing staphylococci inside human monocytes and staphylococci in broth.                                                                    |
| Baltch <i>et al.</i> , (2008) [5]   | 2 Pairs of SCV and parental isolates (All DAP-S)                      | Extracellular and Intracellular killing of staphylococci in human monocytes culture | DAP 0.5–1 µg/mL (1× MIC)<br>Gen 1–8 µg/mL (0.5× MIC)                                                                   | DAP + Gen showed synergy for killing intracellular parental isolates and 1 SCV. For extracellular killing, DAP alone efficiently killed 1 SCV and the parental isolates. |
| Miro <i>et al.</i> , (2009) [6]     | 3 MRSA (DAP-S)                                                        | Time-kill                                                                           | DAP 0.25–1 µg/mL (0.5–2× MIC)<br>Gen 0.5–2 µg/mL                                                                       | DAP + Gen showed synergy against all strains compared to monotherapy.                                                                                                    |
| Entenza <i>et al.</i> , (2010) [7]  | 4 MRSA (DAP-S)<br>2 GISA (1 DAP-S,<br>1 DAP-R)                        | Progressive DAP resistance selection followed by MIC test                           | 2-fold stepwise increasing DAP<br>Gen 0.0625–32µg/mL (0.25× MIC)                                                       | Addition of Gen did not prevent DAP-R among all the tested isolates.                                                                                                     |

Table S1. Cont.

| Author (Year)                          | Isolates Tested                                       | Methods                                                                       | Dose                                                                  | Findings                                                                                                                                                                                                                                    |
|----------------------------------------|-------------------------------------------------------|-------------------------------------------------------------------------------|-----------------------------------------------------------------------|---------------------------------------------------------------------------------------------------------------------------------------------------------------------------------------------------------------------------------------------|
| <i>in vitro</i> pharmacodynamic models |                                                       |                                                                               |                                                                       |                                                                                                                                                                                                                                             |
| LaPlante <i>et al.</i> , (2004) [8]    | 1 MSSA (DAP-S)<br>1 MRSA (DAP-S)                      | Simulated endocardial vegetation                                              | DAP 6 mg/kg/day<br>Gen 1.3 mg/kg/day                                  | DAP + Gen increased bactericidal rates in the first 24 h and eradicated staphylococci as efficient as DAP monotherapy after 72 h                                                                                                            |
| Tsuji <i>et al.</i> , (2006) [2]       | 1 MSSA (DAP-S)<br>1 MRSA (DAP-S)                      | Simulated endocardial vegetation                                              | DAP 6 or 8 mg/kg<br>3 dose of Gen 1 mg/kg or 1 dose of Gen 5 mg/kg    | Gen enhanced bactericidal activity of DAP in all combinations.                                                                                                                                                                              |
| DeRyke <i>et al.</i> , (2006) [9]      | 1 MRSA (DAP-S)<br>1 CA-MRSA (DAP-S)<br>1 MSSA (DAP-S) | Serum bactericidal titers (Serum from volunteers with DAP alone or DAP + Gen) | DAP 6 mg/kg<br>Gen 1 mg/kg                                            | Addition of Gen did not enhance serum bactericidal titers against staphylococci compared to DAP monotherapy.                                                                                                                                |
| Rose <i>et al.</i> , (2008) [10]       | 3 DAP-S<br>4 DAP-R                                    | Simulated endocardial vegetation                                              | DAP 6 mg/kg/day (DAP6)<br>DAP 10 mg/kg/day (DAP10)<br>Gen 5 mg/kg/day | 2 DAP-S isolates were eradicated by DAP6 alone or DAP6 + Gen. 1 DAP-S isolate was only eradicated by DAP6 + Gen. For DAP-R isolates, only 1 isolate was eradicated by DAP6 + Gen. 2 isolates were eradicated by DAP10 alone or DAP10 + Gen. |
| LaPlante <i>et al.</i> , (2009) [11]   | 2 MRSA (DAP-S)                                        | Simulated endocardial vegetation                                              | DAP 6 mg/kg/day<br>Gen 1.3 mg/kg/day                                  | DAP monotherapy has better <i>in vitro</i> activity than DAP + Gen within the first 24 h.                                                                                                                                                   |
| Animal model                           |                                                       |                                                                               |                                                                       |                                                                                                                                                                                                                                             |
| Miró <i>et al.</i> , (2009) [6]        | 1 MRSA (DAP-S)                                        | Rabbit infective endocarditis                                                 | DAP 6 mg/kg<br>Gen 1 mg/kg                                            | DAP + Gen eradicated staphylococci as efficient as DAP monotherapy.                                                                                                                                                                         |

DAP: daptomycin; Gen: gentamicin; DAP-S: daptomycin-susceptible; DAP-R: daptomycin-resistant; MSSA: methicillin-susceptible *Staphylococcus aureus*; MRSA: methicillin-resistant *Staphylococcus aureus*; MIC: minimum inhibitory concentration; GISA: glycopeptides-intermediate *Staphylococcus aureus*; hGISA: heterogeneous glycopeptides-intermediate *Staphylococcus aureus*; VISA: vancomycin-intermediate *Staphylococcus aureus*; VRSA: vancomycin-resistant *Staphylococcus aureus*; SCV: small-colony variant.

**Table S2.** Mutations identified between isogenic *S. aureus* strain pairs used in this study [12,13].

| Gene           | Protein                                          | Function                                                    | <sup>a</sup> Mutation |            | Reference |
|----------------|--------------------------------------------------|-------------------------------------------------------------|-----------------------|------------|-----------|
|                |                                                  |                                                             | Type                  | Change     |           |
| 1. A6224/A6226 |                                                  |                                                             |                       |            |           |
| <i>dltA</i>    | D-alanine-poly(phosphoribitol) ligase, subunit 1 | Cell wall/outer membrane metabolism                         | <sup>b</sup> SNP      | Ser38Arg   |           |
| <i>yycI</i>    | Regulatory protein, WalKR operon                 | Cell wall/outer membrane metabolism                         | Deletion              | Frameshift |           |
| <i>atl</i>     | Bifunctional autolysin                           | Cell wall/outer membrane metabolism                         | SNP                   | Ser752Ser  |           |
| <i>arlS</i>    | Histidine-kinase                                 | Signal transduction                                         | Insertion             | Frameshift |           |
| <i>mraW</i>    | S-adenosyl-methyltransferase                     | Amino acid metabolism/transport                             | Deletion              | Frameshift |           |
| <i>pcrA</i>    | ATP-dependent helicase                           | DNA replication and repair                                  | SNP                   | Glu455Glu  |           |
| <i>tilS</i>    | tRNA(ile)-lysidine synthetase                    | Nucleic acid metabolism/transport                           | SNP                   | Met128Ile  | [13]      |
| SA0587         | PsaA adhesion homologue                          | Inorganic ion transport/metabolism                          | Deletion              | Frameshift |           |
| SA1528         | Universal stress protein                         | Stress response                                             | SNP                   | Leu105Leu  |           |
| SA0837         | 2-siopropylmalate synthase                       | Amino acid metabolism/transport                             | Insertion             | Frameshift |           |
| SA1778         | Hypothetical protein                             | Unknown                                                     | Deletion              | Frameshift |           |
| SA0349         | Hypothetical protein                             | Unknown                                                     | SNP                   | Pro474Ser  |           |
| SA0668         | Hypothetical protein                             | Unknown                                                     | SNP                   | Val41Ile   |           |
| 2. A9719/A9744 |                                                  |                                                             |                       |            |           |
| <i>mprF</i>    | Lysylphosphatidylglycerol synthetase             | Oxacillin resistance related protein                        | SNP                   | Ser337Leu  |           |
| <i>cls2</i>    | Cardiolipin synthetase                           | Phosphatidylcholine-hydrolysing phospholipase D             | SNP                   | Ala23Val   |           |
| <i>atl</i>     | N-acetylmuramoyl-L-alanine amidase               | Bi-funtional autolysin involved in cell envelope biogenesis | Insertion             | Frameshift | [12]      |
| <i>agrC</i>    | Accessory gene regulator C                       | Sensor histidine kinase                                     | Insertion             | Frameshift |           |
| <i>stp1</i>    | Protein phosphatase 2C domain-containing protein | Serine/threonine specific protein phosphatase               | SNP                   | Met99Ile   |           |
| SA1264         | Conserved hypothetical protein                   | Unknown function                                            | SNP                   | Gly47Glu   |           |
| 3. A8819/A8817 |                                                  |                                                             |                       |            |           |
| <i>mprF</i>    | Lysylphosphatidylglycerol synthetase             | Oxacillin resistance related protein                        | SNP                   | Thr345Ile  |           |
| <i>cls2</i>    | Cardiolipin synthetase                           | Phosphatidylcholine-hydrolysing phospholipase               | SNP                   | Phe60Ser   |           |
| <i>leuS</i>    | Leucyl-tRNA synthetase                           | Incorporation of leucine into tRNA                          | SNP                   | Asn468Asp  | [12]      |
| <i>mnaA</i>    | UDP-N-acetylglucosamine 2-epimerase              | Sialic acid synthesis                                       | SNP                   | Arg302Ser  |           |
| <i>ispA</i>    | Geranyltranstransferase                          | Polyketide biosynthesis                                     | Deletion              | Frameshift |           |

Table S2. Cont.

| Gene           | Protein                                           | Function                        | <sup>a</sup> Mutation |             | Reference |
|----------------|---------------------------------------------------|---------------------------------|-----------------------|-------------|-----------|
|                |                                                   |                                 | Type                  | Change      |           |
| 4. A9635/A9639 |                                                   |                                 |                       |             |           |
| <i>vraG</i>    | ABC transporter permease                          | ABC transporter, defense        | SNP                   | Ala580Val   | [13]      |
| <i>rsbW</i>    | Ser-protein kinase, anti- $\sigma$ $\beta$ factor | Transcriptional regulation      | Deletion              | 88Ser/89Phe |           |
| <i>rpsU</i>    | Ribosomal protein S21                             | Translation                     | Deletion              | Frameshift  |           |
| <i>ilvC</i>    | Ketol-acid reductoisomerase                       | Amino acid metabolism/transport | Deletion              | 30Gln/31Gly |           |

<sup>a</sup> Nucleotide and amino acid mutations are those identified in the daptomycin-exposed strains compared to their isogenic parent strains; <sup>b</sup> SNP—Single nucleotide polymorphism.

## References

1. Snyderman, D.R.; McDermott, L.A.; Jacobus, N.V. Evaluation of *in vitro* interaction of daptomycin with gentamicin or beta-lactam antibiotics against staphylococcus aureus and enterococci by fic index and timed-kill curves. *J. Chemother.* **2005**, *17*, 614–621.
2. Tsuji, B.T.; Rybak, M.J. Etest synergy testing of clinical isolates of staphylococcus aureus demonstrating heterogeneous resistance to vancomycin. *Diagn. Microbiol. Infect. Dis.* **2006**, *54*, 73–77.
3. Credito, K.; Lin, G.; Appelbaum, P.C. Activity of daptomycin alone and in combination with rifampin and gentamicin against staphylococcus aureus assessed by time-kill methodology. *Antimicrob. Agents Chemother.* **2007**, *51*, 1504–1507.
4. Baltch, A.L.; Ritz, W.J.; Bopp, L.H.; Michelsen, P.B.; Smith, R.P. Antimicrobial activities of daptomycin, vancomycin, and oxacillin in human monocytes and of daptomycin in combination with gentamicin and/or rifampin in human monocytes and in broth against staphylococcus aureus. *Antimicrob. Agents Chemother.* **2007**, *51*, 1559–1562.
5. Baltch, A.L.; Ritz, W.J.; Bopp, L.H.; Michelsen, P.; Smith, R.P. Activities of daptomycin and comparative antimicrobials, singly and in combination, against extracellular and intracellular staphylococcus aureus and its stable small-colony variant in human monocyte-derived macrophages and in broth. *Antimicrob. Agents Chemother.* **2008**, *52*, 1829–1833.
6. Miro, J.M.; Garcia-de-la-Maria, C.; Armero, Y.; Soy, D.; Moreno, A.; del Rio, A.; Almela, M.; Sarasa, M.; Mestres, C.A.; Gatell, J.M.; *et al.* Addition of gentamicin or rifampin does not enhance the effectiveness of daptomycin in treatment of experimental endocarditis due to methicillin-resistant staphylococcus aureus. *Antimicrob. Agents Chemother.* **2009**, *53*, 4172–4177.

7. Entenza, J.M.; Giddey, M.; Vouillamoz, J.; Moreillon, P. *In vitro* prevention of the emergence of daptomycin resistance in staphylococcus aureus and enterococci following combination with amoxicillin/clavulanic acid or ampicillin. *Int. J. Antimicrob. Agents* **2010**, *35*, 451–456.
8. LaPlante, K.L.; Rybak, M.J. Impact of high-inoculum staphylococcus aureus on the activities of nafcillin, vancomycin, linezolid, and daptomycin, alone and in combination with gentamicin, in an *in vitro* pharmacodynamic model. *Antimicrob. Agents Chemother.* **2004**, *48*, 4665–4672.
9. DeRyke, C.A.; Sutherland, C.; Zhang, B.; Nicolau, D.P.; Kutti, J.L. Serum bactericidal activities of high-dose daptomycin with and without coadministration of gentamicin against isolates of staphylococcus aureus and enterococcus species. *Antimicrob. Agents Chemother.* **2006**, *50*, 3529–3534.
10. Rose, W.E.; Leonard, S.N.; Rybak, M.J. Evaluation of daptomycin pharmacodynamics and resistance at various dosage regimens against staphylococcus aureus isolates with reduced susceptibilities to daptomycin in an *in vitro* pharmacodynamic model with simulated endocardial vegetations. *Antimicrob. Agents Chemother.* **2008**, *52*, 3061–3067.
11. LaPlante, K.L.; Woodmansee, S. Activities of daptomycin and vancomycin alone and in combination with rifampin and gentamicin against biofilm-forming methicillin-resistant staphylococcus aureus isolates in an experimental model of endocarditis. *Antimicrob. Agents Chemother.* **2009**, *53*, 3880–3886.
12. Peleg, A.Y.; Miyakis, S.; Ward, D.V.; Earl, A.M.; Rubio, A.; Cameron, D.R.; Pillai, S.; Moellering, R.C., Jr.; Eliopoulos, G.M. Whole genome characterization of the mechanisms of daptomycin resistance in clinical and laboratory derived isolates of staphylococcus aureus. *PLoS ONE* **2012**, *7*, e28316.
13. Cameron, D.R.; Ward, D.V.; Kostoulas, X.; Howden, B.P.; Moellering, R.C., Jr.; Eliopoulos, G.M.; Peleg, A.Y. Serine/threonine phosphatase stp1 contributes to reduced susceptibility to vancomycin and virulence in staphylococcus aureus. *J. Infect. Dis.* **2012**, *205*, 1677–1687.
